# Supplementary material for: A Peptide HEPFYGNEGALR from Apostichopus japonicus Alleviates Acute Alcoholic Liver Injury by Enhancing Antioxidant Response in Male C57BL/6J Mice
Source: MDPI journal article supplement (doi:10.3390/molecules27185839), 2022-09-08
Supplement: s1 [file s1]

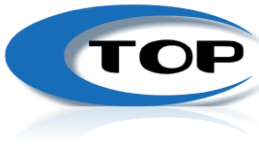

## Certificate of Analysis

Product Name: WW-621-2

Lot No: Top-peptide-1933

Peptide Sequence: HEPFYGNELALR

Molecular Weight: 1389.49

Weight: 900mg

Storage: -4°C or -20°C

Solubility: Normal

| Test Items    | Specification                   | Results |
|---------------|---------------------------------|---------|
| Appearances   | -----                           | powder  |
| Purity (HPLC) | >95%                            | 96.46%  |
| Mas           | see attached MS Analysis Report |         |

**\*Note: this product is intended for research use only; not for diagnostic or human use.**

**\*Important: Stable at 2-8°C, but should be kept at -20°C for long term storage, preferably desiccated.**

Quality Assurance By: \_\_\_\_\_

Date: 2017-5-10

**Quality Control Department**

**Top-peptide Co., Ltd**

Address: Room 1729, Yuzhou International 3, Lane No. 1, Jin Xiang Road 201, Pudong, Shanghai, China, 201209

、 <http://www.top-peptide.com>



**Top-Peptide Co.,Ltd.**

**HPLC Analysis Report**

Sample ID:WW-621-2

Sequece: HEPFYGNEGALR

Column :4.6\*150mm,kromasil C18-5

Solvent A :0.1%Trifluoroacetic in 100% Acetonirile

Solvent B :0.1%Trifluoroacetic in 100% Water

|          |         |     |     |
|----------|---------|-----|-----|
| Gradient | :       | A   | B   |
|          | 0.01min | 5%  | 95% |
|          | 25.0min | 70% | 30% |

Flow rate :1.0ml/min

Wavelength :214nm

Volume :10ul

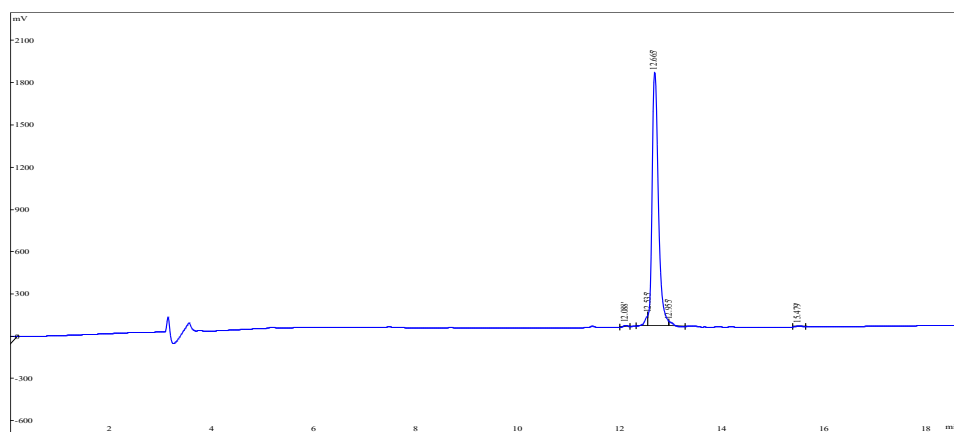

| Rank  | Time   | Name | Conc.  | Area     |
|-------|--------|------|--------|----------|
| 1     | 12.088 |      | 0.4005 | 63942    |
| 2     | 12.535 |      | 2.118  | 338170   |
| 3     | 12.665 |      | 96.46  | 15400155 |
| 4     | 12.955 |      | 0.672  | 107288   |
| 5     | 15.479 |      | 0.3439 | 54901    |
| Total |        |      | 100    | 15964456 |

**Top-peptide Co., Ltd**

Address: Room 1729, Yuzhou International 3, Lane No. 1,Jin Xiang Road 201, Pudong, Shanghai, China, 201209

、 <http://www.top-peptide.com>



**Top-Peptide Co.,Ltd.**

**MS Analysis Report**

Sample ID: WW-621-2

Expected MS: 1389.49

Flow rate : 0.2ml/min

Run Time: 1min

Buffer A : 0.1% HCOOH in water

Buffer B: 0.1% HCOOH in

Acetonitrile

**Top-peptide Co., Ltd**

Address: Room 1729, Yuzhou International 3, Lane No. 1, Jin Xiang Road 201, Pudong, Shanghai, China, 201209

、 <http://www.top-peptide.com>
