# Supplementary figures and images for: A Peptide HEPFYGNEGALR from Apostichopus japonicus Alleviates Acute Alcoholic Liver Injury by Enhancing Antioxidant Response in Male C57BL/6J Mice
Source: MDPI journal article supplement (doi:10.3390/molecules27185839), 2022-09-08

MS Spectrum

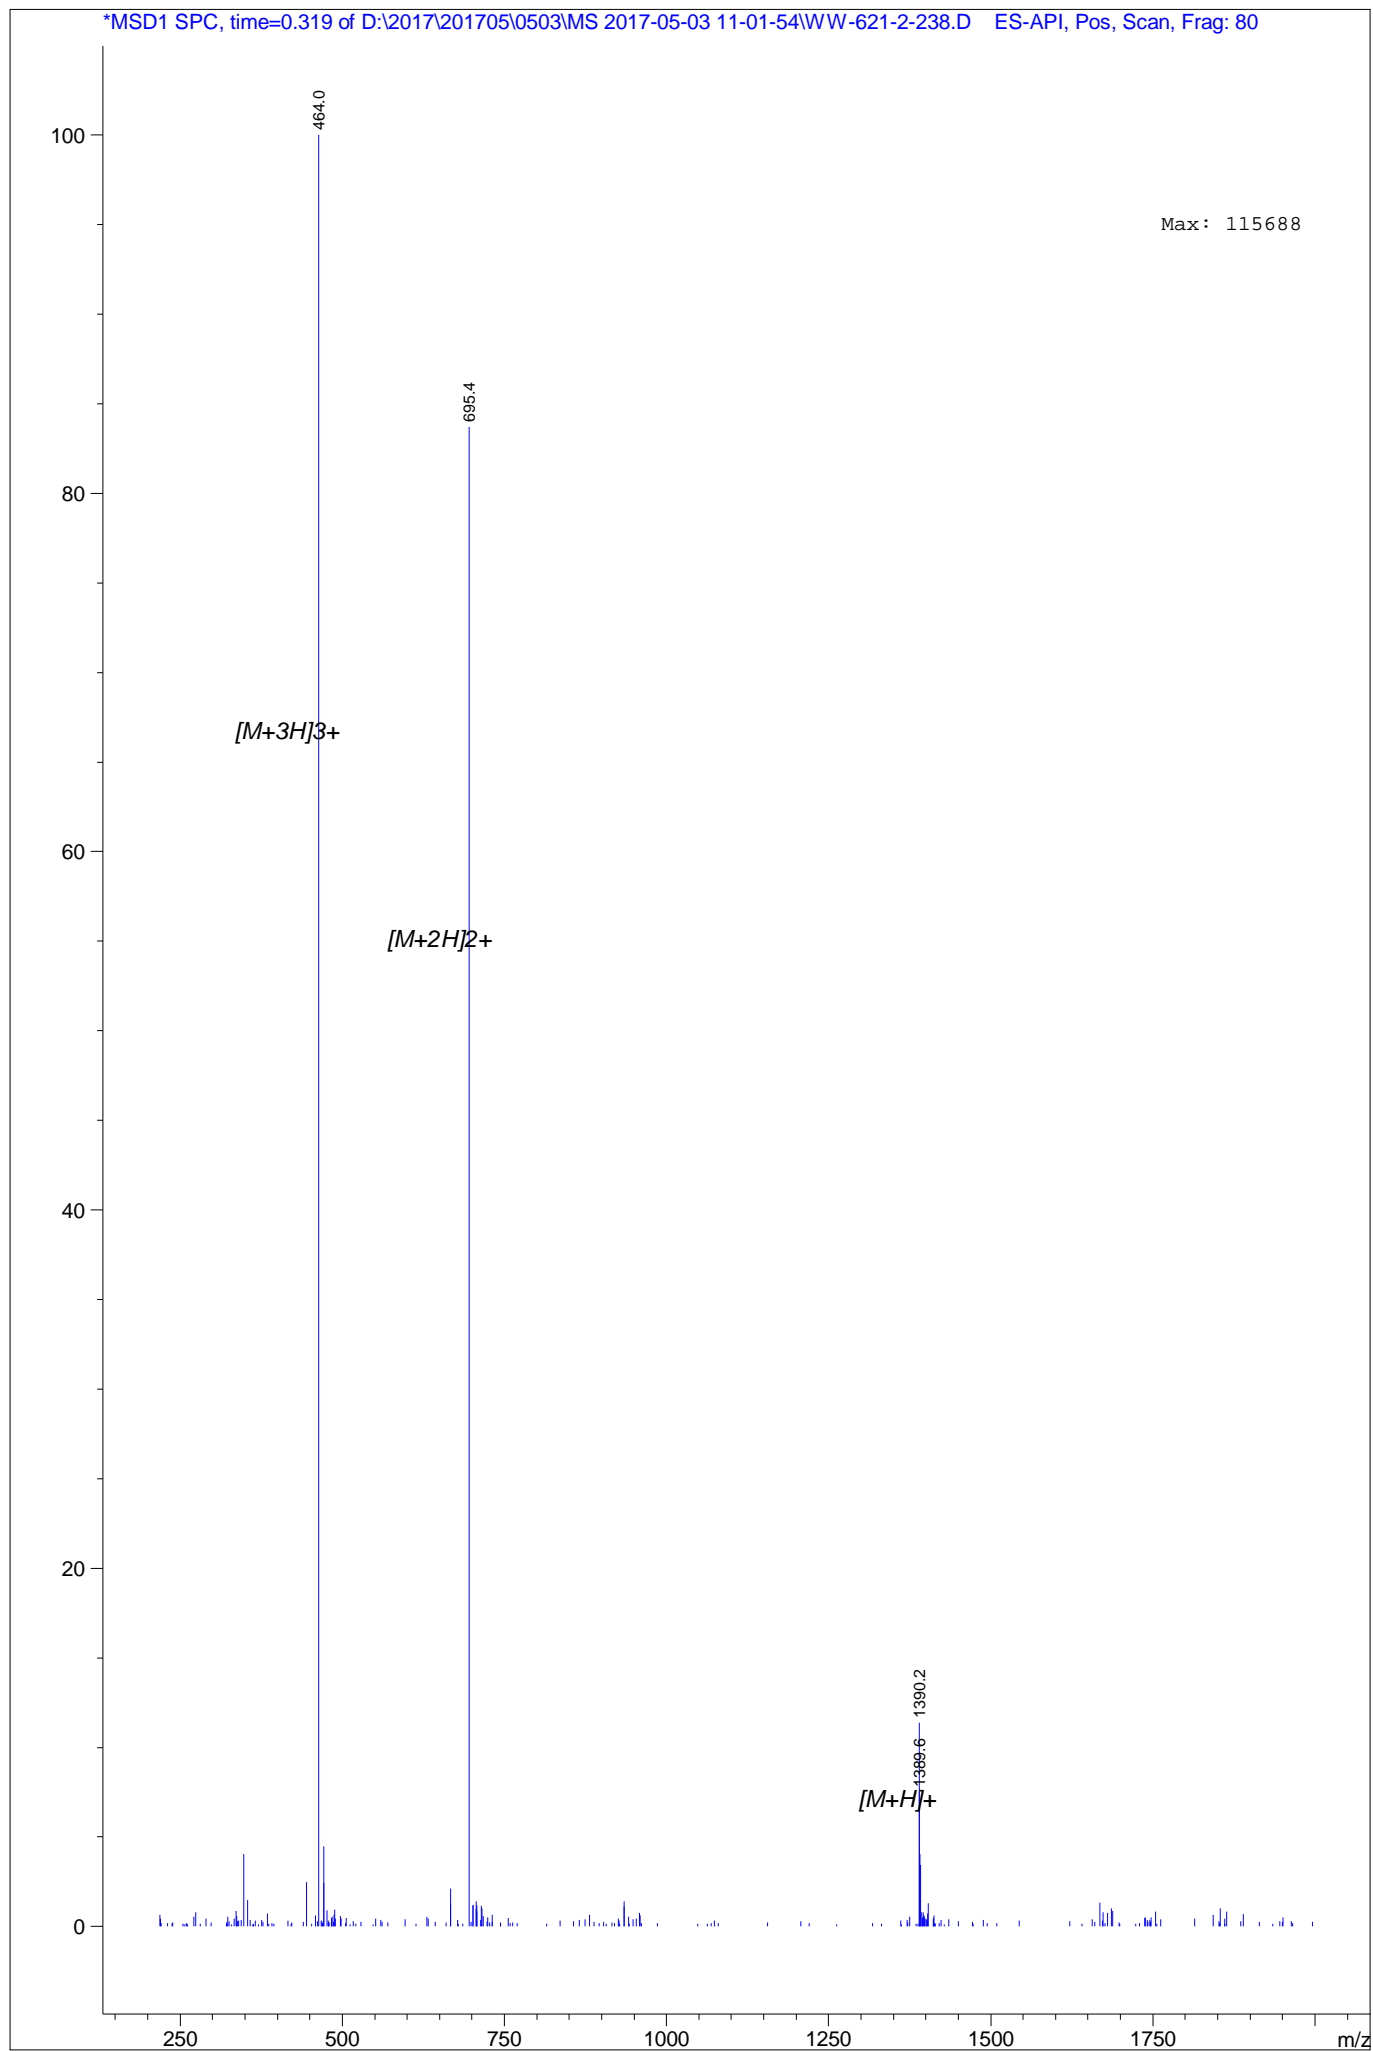

Supplement: s1 [file s1]
